# Supplementary material for: Di-maltol-polyamine ligands to form heterotrinuclear metal complexes: solid state, aqueous solution and magnetic characterization
Source: Royal Society of Chemistry journal article supplement (doi:10.1039/c3dt32130d), 2013-01-01
Supplement: c3dt32130d.pdf [file c3dt32130d.pdf]

### Electronic Supplementary Informations

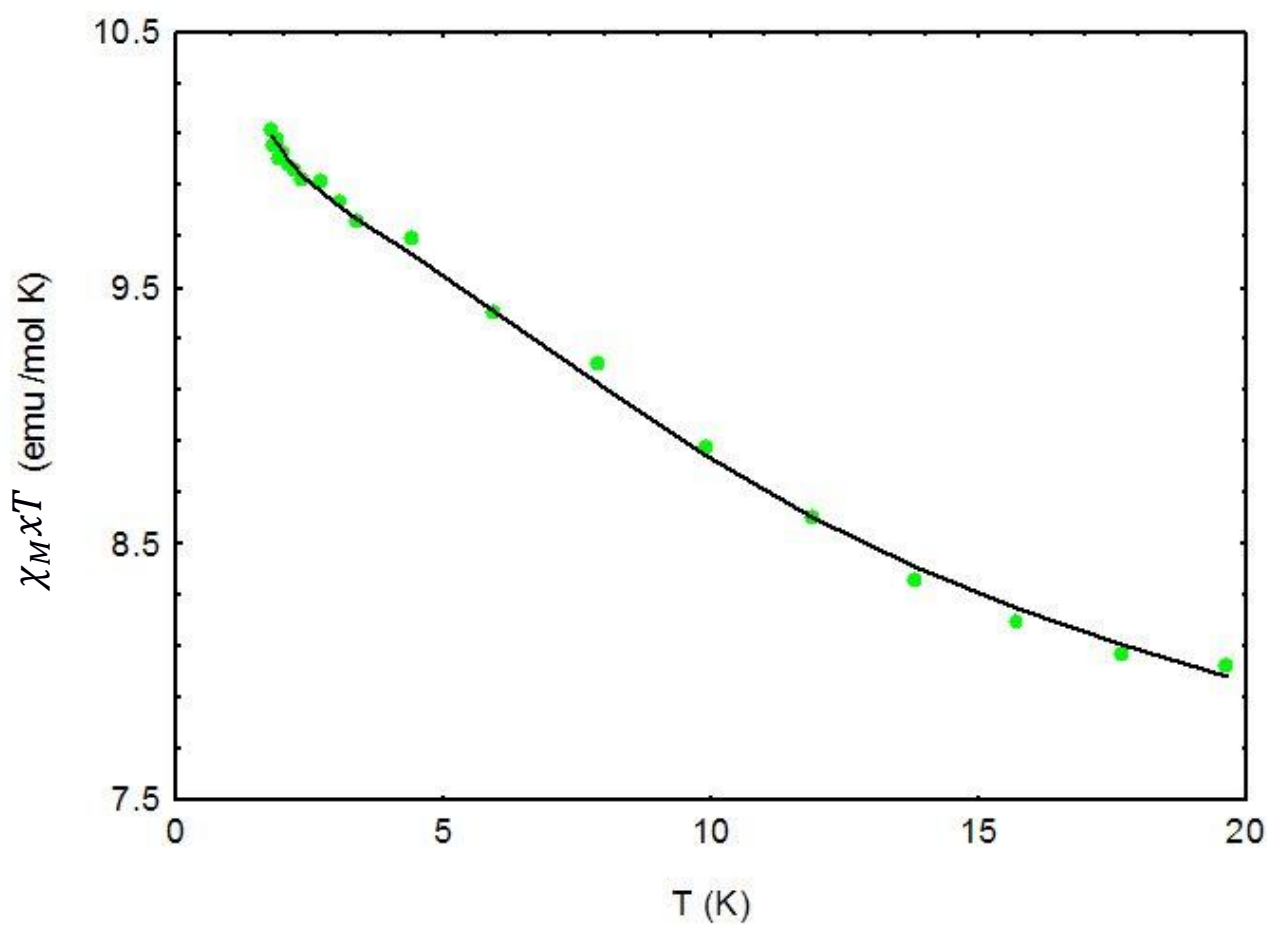

Figure S1 Thermal variation of the  $\chi_M x T$  product for  $\{\text{Gd}[\text{Co}(\text{H}_2\text{Maltonis})]_2\}^{3+}$ . The full line corresponds to the best data fit.
